# Supplementary material for: DNA Scaffolded Silver Clusters: A Critical Study
Source: MDPI journal article supplement (doi:10.3390/molecules21020216), 2016-02-17
Supplement: s1 [file s1]

# Supplementary Materials: DNA Scaffolded Silver Clusters: A Critical Study

Bidisha Sengupta, Christa Corley, Keith Cobb, Anthony Saracino, Steffen Jockusch

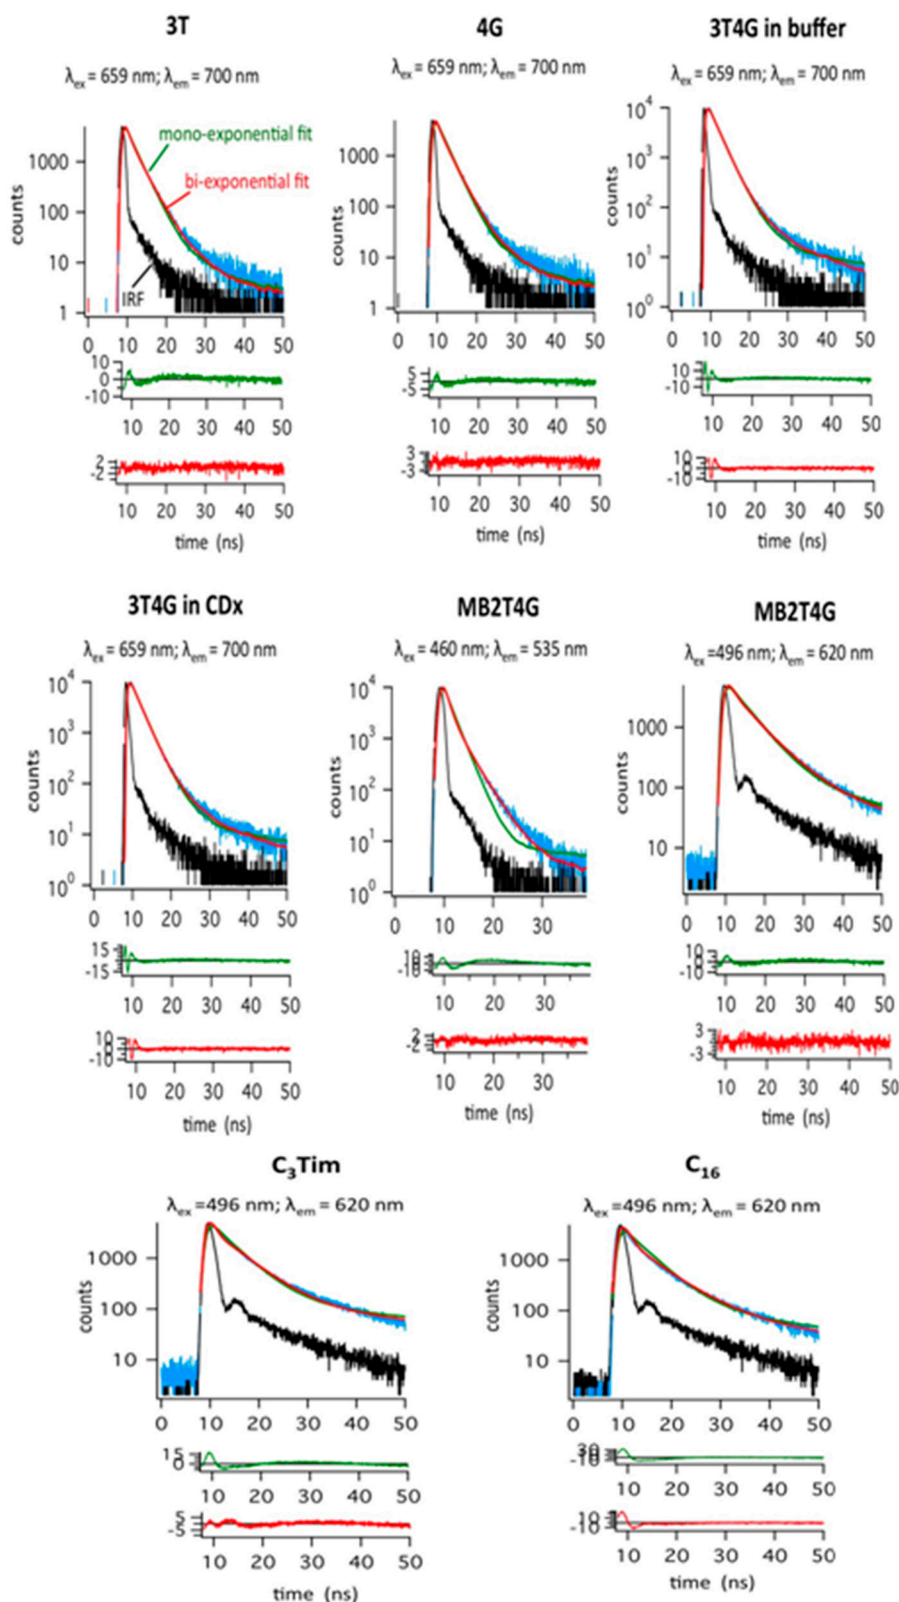

Figure S1. Fluorescence decay profiles of Ag-NC on different DNA templates.

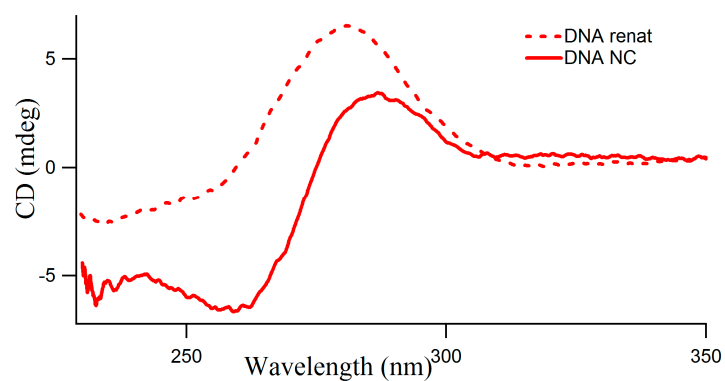

**Figure S2.** CD spectra of renatured 3T4G template in unconjugated (dashed) and Ag-NC conjugated (solid) states.

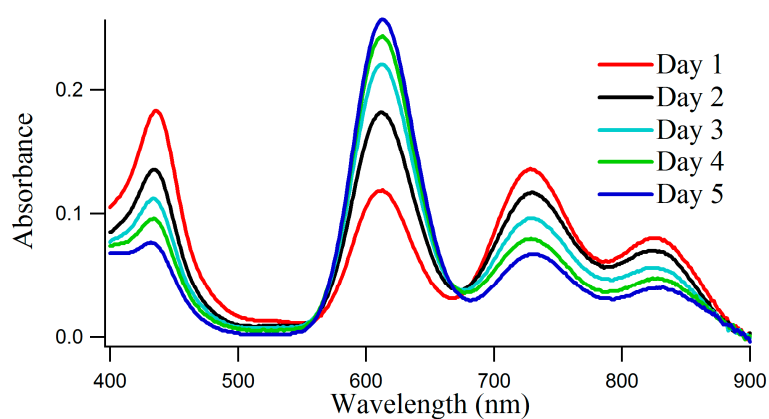

**Figure S3.** Aging of the 3T4G Ag-NCs for [DNA]:[Ag] = 1:6, for 5 days.

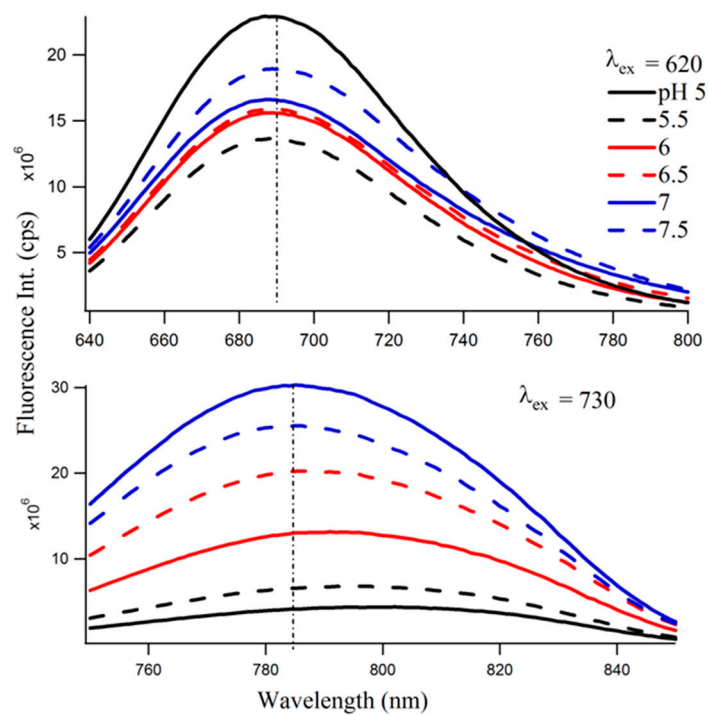

**Figure S4.** Fluorescence emission spectra of Ag-nanoclusters on 3T4G template in 10 mM citrate buffer of various pH.

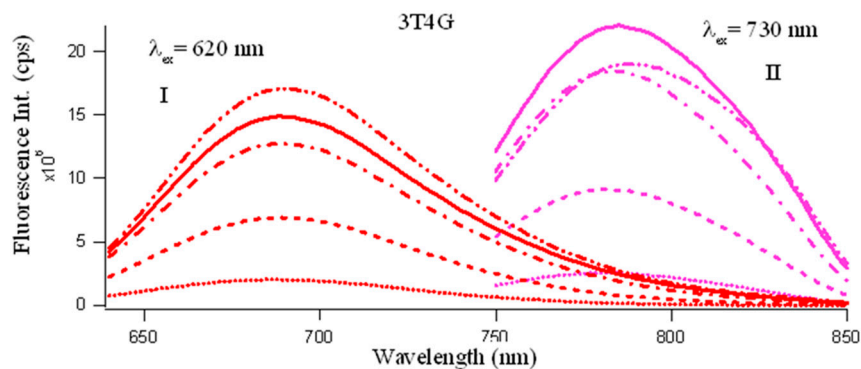

**Figure S5.** Influence of increasing silver concentrations on the fluorescence emission properties of the silver nanoclusters on 3T4G DNA templates in 10 mM citrate buffer of pH 6.5. [3T4G]:[Ag] is 1:1 (.....), 1:2 (---), 1:4 (-.-.), 1:6 (—), 1:8 (-.-.-).

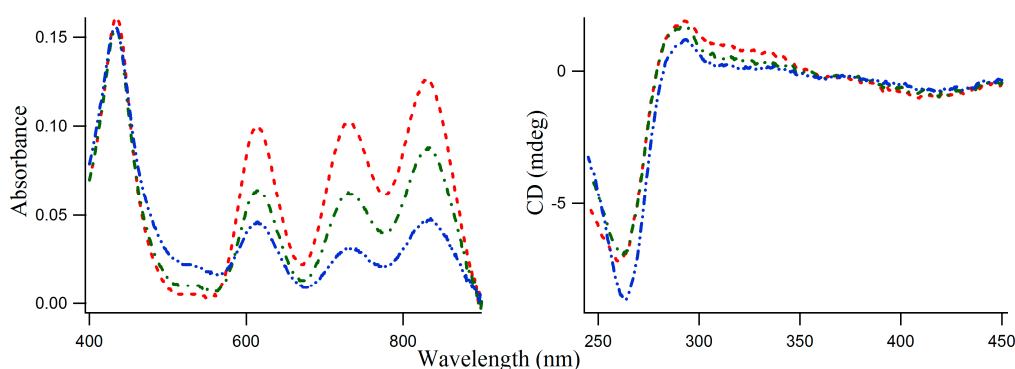

**Figure S6.** Absorption (left) and circular dichroism (right) spectra of 3T4G templated Ag-NC in citrate buffer of pH 6.5 with  $\text{NaNO}_3$  salt concentrations of 60 (red ---), 100 (green -.-.) and 200 (blue -.-.-) mM.

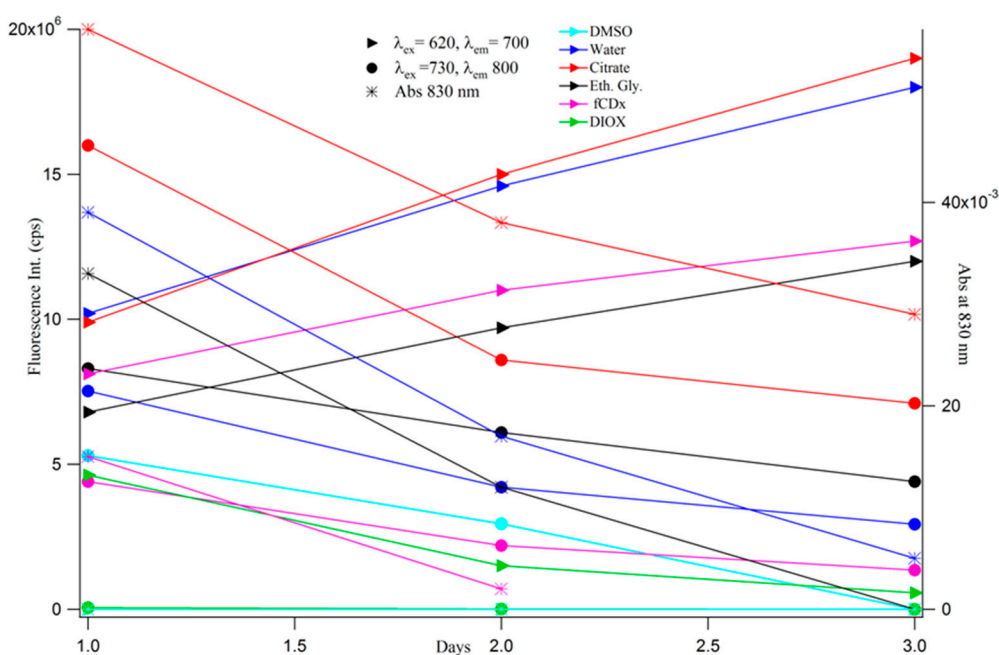

**Figure S7.** The variation of the fluorescence emission intensities and absorbance of 3T4G scaffolded Ag-NC species I ( $\lambda_{\text{ex}} = 620$ ), II ( $\lambda_{\text{ex}} = 730$ ) and III ( $\lambda_{\text{abs}} = 830$ ) with time (days) in solvents of different polarities (7.5  $\mu\text{M}$  3T4G enclosed Ag-NCs with 45  $\mu\text{M}$   $\text{AgNO}_3$ , 45  $\mu\text{M}$   $\text{NaBH}_4$ ).
